# Supplementary material for: LINC01638 regulates miR-128/PDK1 to promotes cell proliferation and drug resistance in ovarian cancer
Source: Research Square preprint supplement (doi:10.21203/rs.3.rs-1509617/v3), 2022-05-19
Supplement: Supplementary file 1 [file 54b42ba0d12a75684a3b4584.docx]

| Characteristics | Number of patients | LINC01638  Low expression (<median) | LINC01638  High expression (≥ median) | P value |
| --- | --- | --- | --- | --- |
| Number | 63 | 31 | 32 |  |
| Ages(years) |  |  |  | 0.244 |
| <55 | 27 | 11 | 16 |  |
| ≥55 | 36 | 20 | 16 |  |
| FIGO stge |  |  |  | 0.027 |
| I&II | 38 | 23 | 15 |  |
| III&IV | 25 | 8 | 17 |  |
| Grade |  |  |  | 0.001 |
| G1 | 23 | 18 | 5 |  |
| G2&G3 | 40 | 13 | 27 |  |
| Distant metastasis |  |  |  | 0.016 |
| Yes | 19 | 5 | 14 |  |
| No | 44 | 26 | 18 |  |
| Histotype |  |  |  | 0.885 |
| Papillary-serous | 52 | 25 | 27 |  |
| Mucinous | 3 | 2 | 1 |  |
| Endometrioid | 1 | 0 | 1 |  |
| Clear cell | 3 | 2 | 1 |  |
| Undifferentiated | 2 | 1 | 1 |  |
| Adenocarcinoma | 2 | 1 | 1 |  |
| Tumor size (mm) |  |  |  | 0.016 |
| ≤10 | 25 | 17 | 8 |  |
| >10 | 38 | 14 | 24 |  |

**Table 1 Relationship between LINC01683 expression and clinical features of OC patients**
